# Supplementary material
Source: PubMed Central journal article supplement (PMC3074592)
Supplement: NIHMS276861-supplement-01.pdf [file NIHMS276861-supplement-01.pdf]

| Rat  | Date       | Drug   | Maze | Reward |
|------|------------|--------|------|--------|
| R175 |            |        |      |        |
|      | 07/15/2009 | CPP    | RLL  | R-A    |
|      | 07/16/2009 | Wash   | LLR  | L-A    |
|      | 07/17/2009 | DCS    | RRL  | R-L    |
|      | 07/18/2009 | Wash   | RRL  | A-R    |
|      | 07/19/2009 | Saline | LLR  | A-R    |
|      | 07/20/2009 | Wash   | RRL  | L-R    |
|      | 07/24/2009 | Wash   | RRL  | R-A    |
|      | 07/25/2009 | Saline | RRL  | A-L    |
|      | 07/26/2009 | Wash   | LRL  | R-L    |
| R176 |            |        |      |        |
|      | 07/15/2009 | Saline | RLL  | A-R    |
|      | 07/16/2009 | Wash   | LRL  | R-L    |
|      | 07/17/2009 | CPP    | RRL  | L-A    |
|      | 07/18/2009 | Wash   | LLR  | L-R    |
|      | 07/19/2009 | DCS    | LRL  | L-R    |
|      | 07/20/2009 | Wash   | RRL  | A-L    |
|      | 07/24/2009 | Wash   | RRL  | R-L    |
|      | 07/25/2009 | DCS    | RRL  | R-A    |
|      | 07/26/2009 | Wash   | LRL  | L-A    |
| R177 |            |        |      |        |
|      | 07/15/2009 | DCS    | LLR  | A-L    |
|      | 07/16/2009 | Wash   | LRL  | A-R    |
|      | 07/17/2009 | Saline | LRL  | L-R    |
|      | 07/18/2009 | Wash   | RRL  | L-A    |
|      | 07/19/2009 | CPP    | RRL  | L-A    |
|      | 07/20/2009 | Wash   | RRL  | R-A    |
|      | 07/24/2009 | Wash   | LRL  | L-R    |
|      | 07/25/2009 | CPP    | LRL  | A-R    |
|      | 07/26/2009 | Wash   | RRL  | A-L    |

Grayed-out days were not analyzed due to corrupted tracking data.

Red days were not included due to repeated mazes.

| Rat        | Date       | Drug   | Maze | Reward |
|------------|------------|--------|------|--------|
| R179       |            |        |      |        |
|            | 08/19/2009 | CPP    | RRL  | R-A    |
|            | 08/20/2009 | Wash   | LRL  | R-L    |
|            | 08/21/2009 | DCS    | RRL  | A-R    |
|            | 08/22/2009 | Wash   | LLR  | L-R    |
|            | 08/23/2009 | Saline | LRL  | A-L    |
|            | 08/24/2009 | Wash   | LLR  | L-A    |
|            |            |        |      |        |
| R180       |            |        |      |        |
|            | 08/19/2009 | Saline | RRL  | A-R    |
|            | 08/20/2009 | Wash   | LRL  | L-A    |
|            | 08/21/2009 | CPP    | LLR  | L-R    |
|            | 08/22/2009 | Wash   | LRL  | A-L    |
|            | 08/23/2009 | DCS    | RRL  | R-A    |
| 08/24/2009 | Wash       | RRL    | R-L  |        |
| R181       |            |        |      |        |
|            | 08/19/2009 | DCS    | LLR  | A-L    |
|            | 08/20/2009 | Wash   | RRL  | A-R    |
|            | 08/21/2009 | Saline | LRL  | L-A    |
|            | 08/22/2009 | Wash   | LLR  | R-A    |
|            | 08/23/2009 | CPP    | RRL  | L-R    |
|            | 08/24/2009 | Wash   | LLR  | R-L    |

**Table S1:** Sequence of behavioral testing for each rat. A change in protocol was made due to an accidental maze repeat in the last drug day for the first group of rats (n=3) (e.g., a sequence such as alternate to left was run on a wash day and the subsequent drug day). To account for this error a repeat of the last three day sequence was done with new counterbalanced maze sequences. A total of 9 experimental days were run, with 4 drug days and 5 wash days for the first 3 rats tested. The second group of rats tested (n=3) were run on the original six day sequence.

## BEFORE SWITCH

Overall ANOVA, effect of

- Rat:  $p < 0.0001$
- Lap:  $p = 0.0001$
- Condition:  $p = 0.0015$

|        | WASH          | CPP           | DCS    | SALINE |
|--------|---------------|---------------|--------|--------|
| WASH   |               |               |        |        |
| CPP    | <b>0.0021</b> |               |        |        |
| DCS    | 0.0453        | <b>0.0003</b> |        |        |
| SALINE | 0.2301        | <b>0.0015</b> | 0.2746 |        |

## AFTER SWITCH

Overall ANOVA, effect of

- Rat:  $p < 0.0001$
- Lap:  $p = 0.5075$
- Condition:  $p = 0.0005$

|        | WASH          | CPP           | DCS    | SALINE |
|--------|---------------|---------------|--------|--------|
| WASH   |               |               |        |        |
| CPP    | <b>0.0018</b> |               |        |        |
| DCS    | <b>0.0076</b> | <b>0.0024</b> |        |        |
| SALINE | 0.0314        | <b>0.0007</b> | 0.3547 |        |

**Table S2:** Significance of VTE pausing time ratios (CPtime/CTtime). Anovas were run over all rats and sessions (overall), and for each individual condition pair. All ANOVAs measured first-order effects. Boldfaced p-values on specific cross-conditions are significant at  $p = 0.05$  after Bonferroni correction of 6-tests ( $p < 0.05/6$ ,  $p < \mathbf{0.0083}$ .)

## BEFORE SWITCH

Overall ANOVA, effect of

- Rat:  $p=0.0108$
- Lap:  $p<0.0001$
- Condition:  $p=0.0002$

|        | WASH          | CPP               | DCS    | SALINE |
|--------|---------------|-------------------|--------|--------|
| WASH   |               |                   |        |        |
| CPP    | <b>0.0002</b> |                   |        |        |
| DCS    | 0.6254        | <b>0.0005</b>     |        |        |
| SALINE | 0.2361        | <b>&lt;0.0001</b> | 0.8782 |        |

## AFTER SWITCH

Overall ANOVA, effect of

- Rat:  $p=0.0438$
- Lap:  $p=0.0833$
- Condition:  $p=0.0068$

|        | WASH          | CPP           | DCS    | SALINE |
|--------|---------------|---------------|--------|--------|
| WASH   |               |               |        |        |
| CPP    | <b>0.0038</b> |               |        |        |
| DCS    | <b>0.0070</b> | <b>0.0044</b> |        |        |
| SALINE | 0.0342        | <b>0.0017</b> | 0.3277 |        |

**Table S3:** Significance of VTE categorizations measured over the first 30 laps pre and post switch in reward contingency. ANOVAs were run over all rats and sessions (overall), and for each individual condition pair. All ANOVAs measured first-order effects. Boldfaced p-values on specific cross-conditions are significant at  $p=0.05$  after Bonferroni correction of 6-tests ( $p<0.05/6$ ,  $p<0.0083$ .)

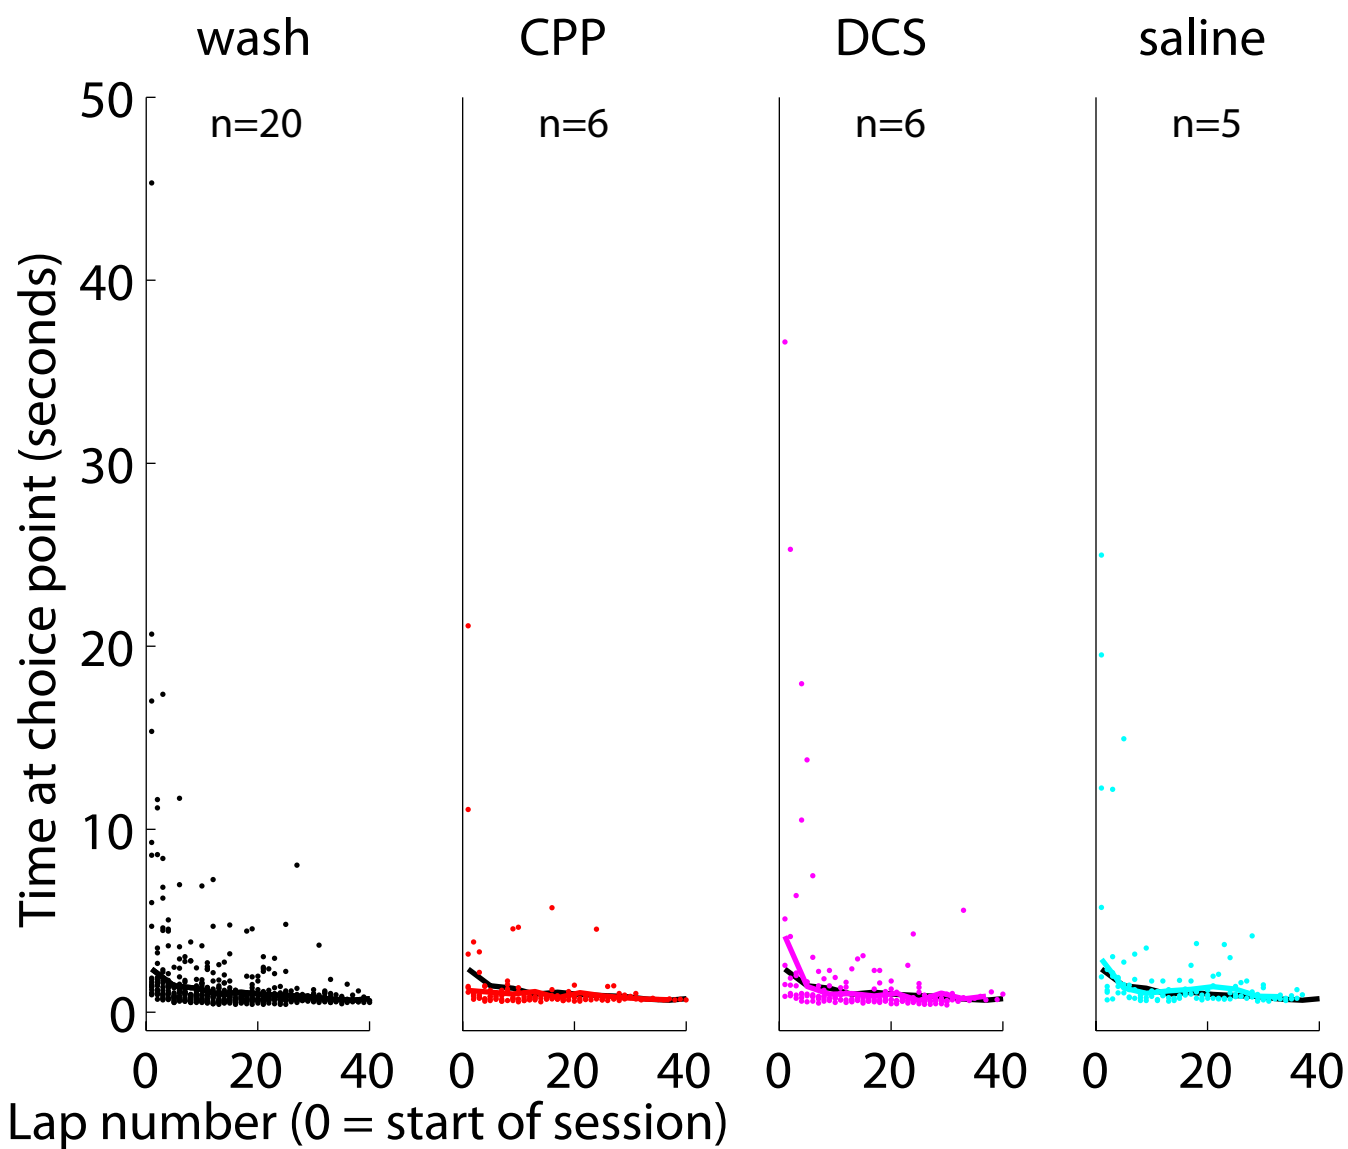

Figure S1a: Time at choice point by condition aligned to start of session. Only laps occurring before the contingency switch are included. The black line repeated on each panel is the average time for the wash condition.

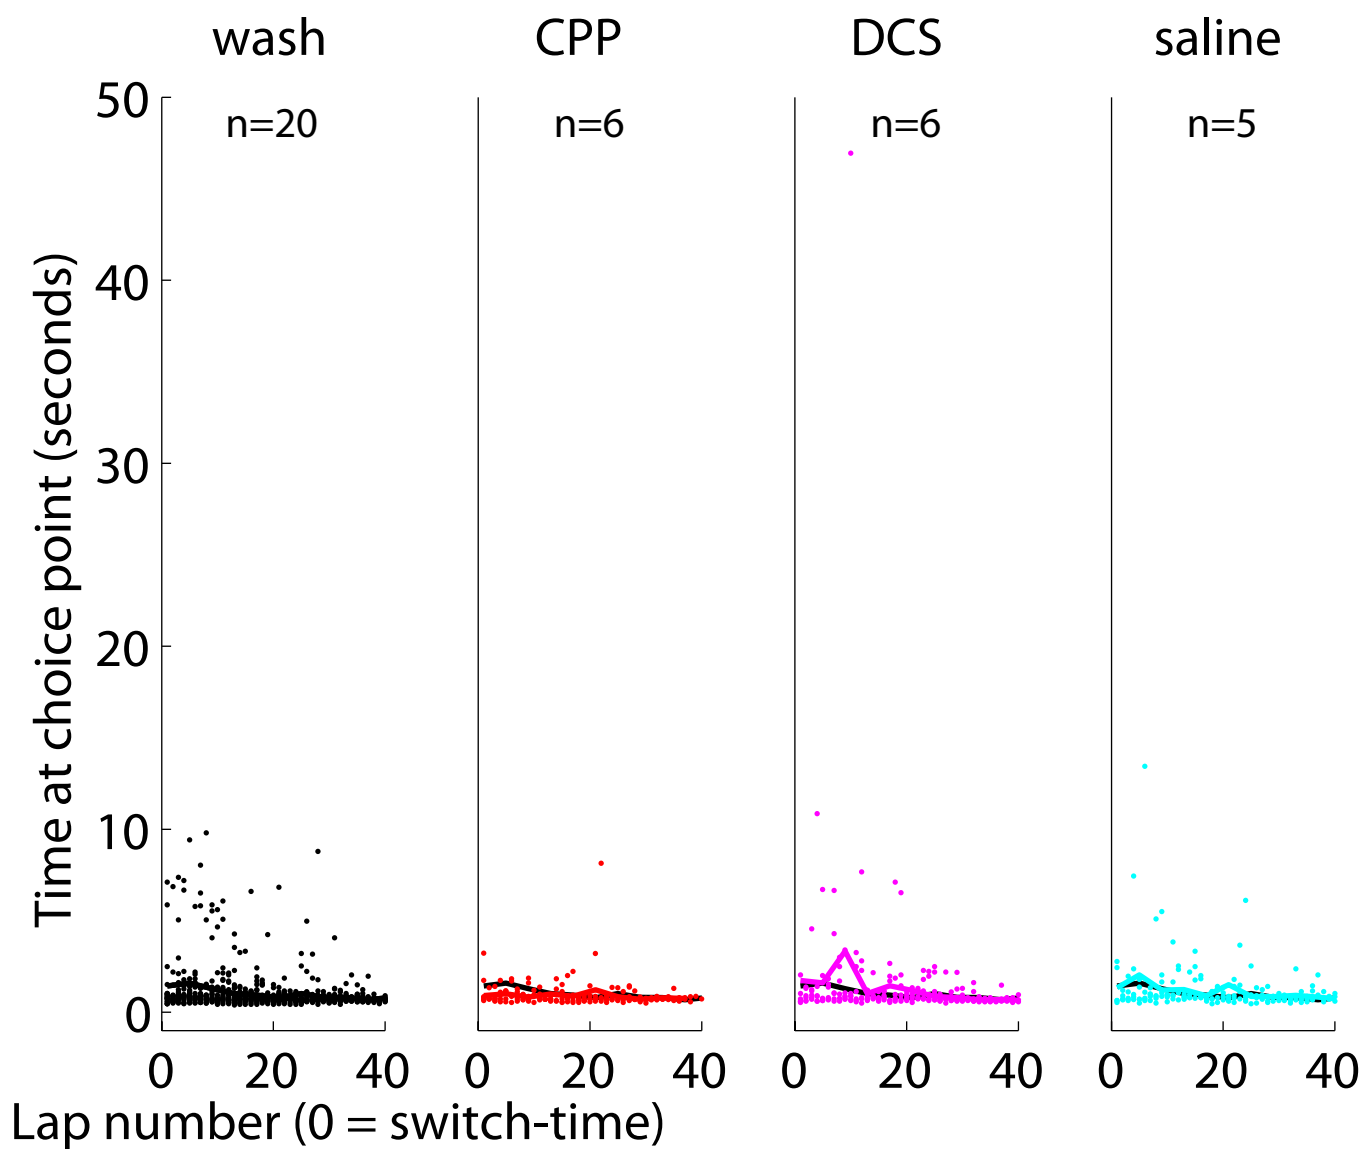

Figure S1b: Time at choice point by condition aligned to switch in reward contingency. Only laps occurring after the contingency switch are included. The black line repeated on each panel is the average time for the wash condition.

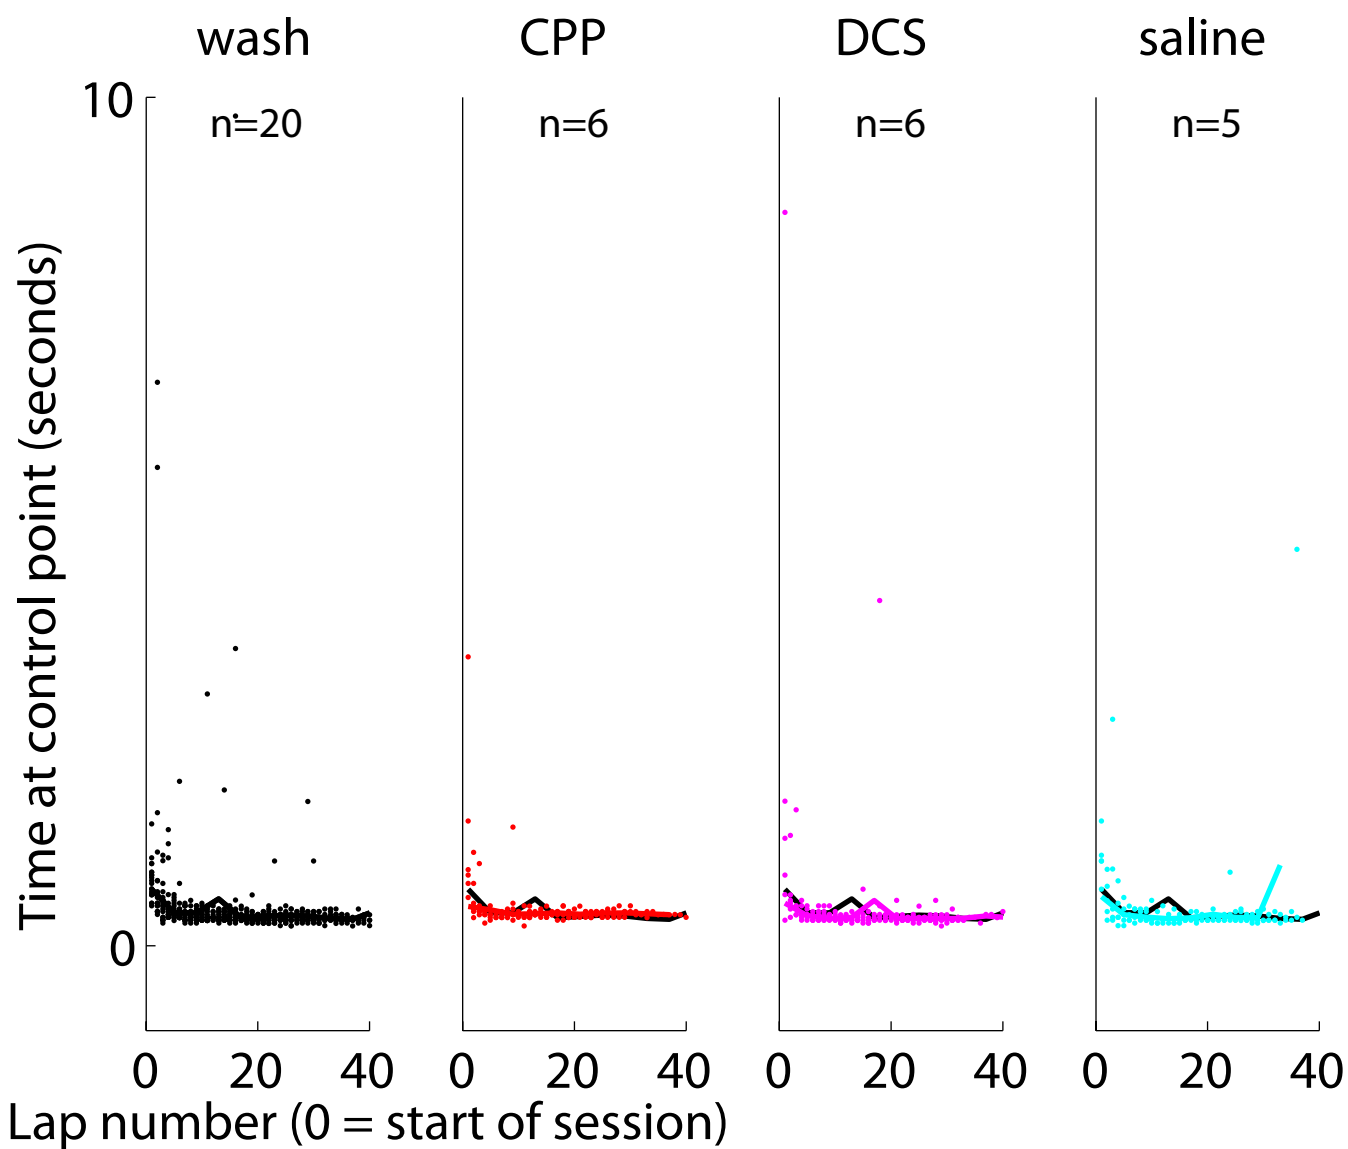

Figure S2a: Time at control point by condition aligned to start of session. Only laps occurring before the contingency switch are included. The black line repeated on each panel is the average time for the wash condition.

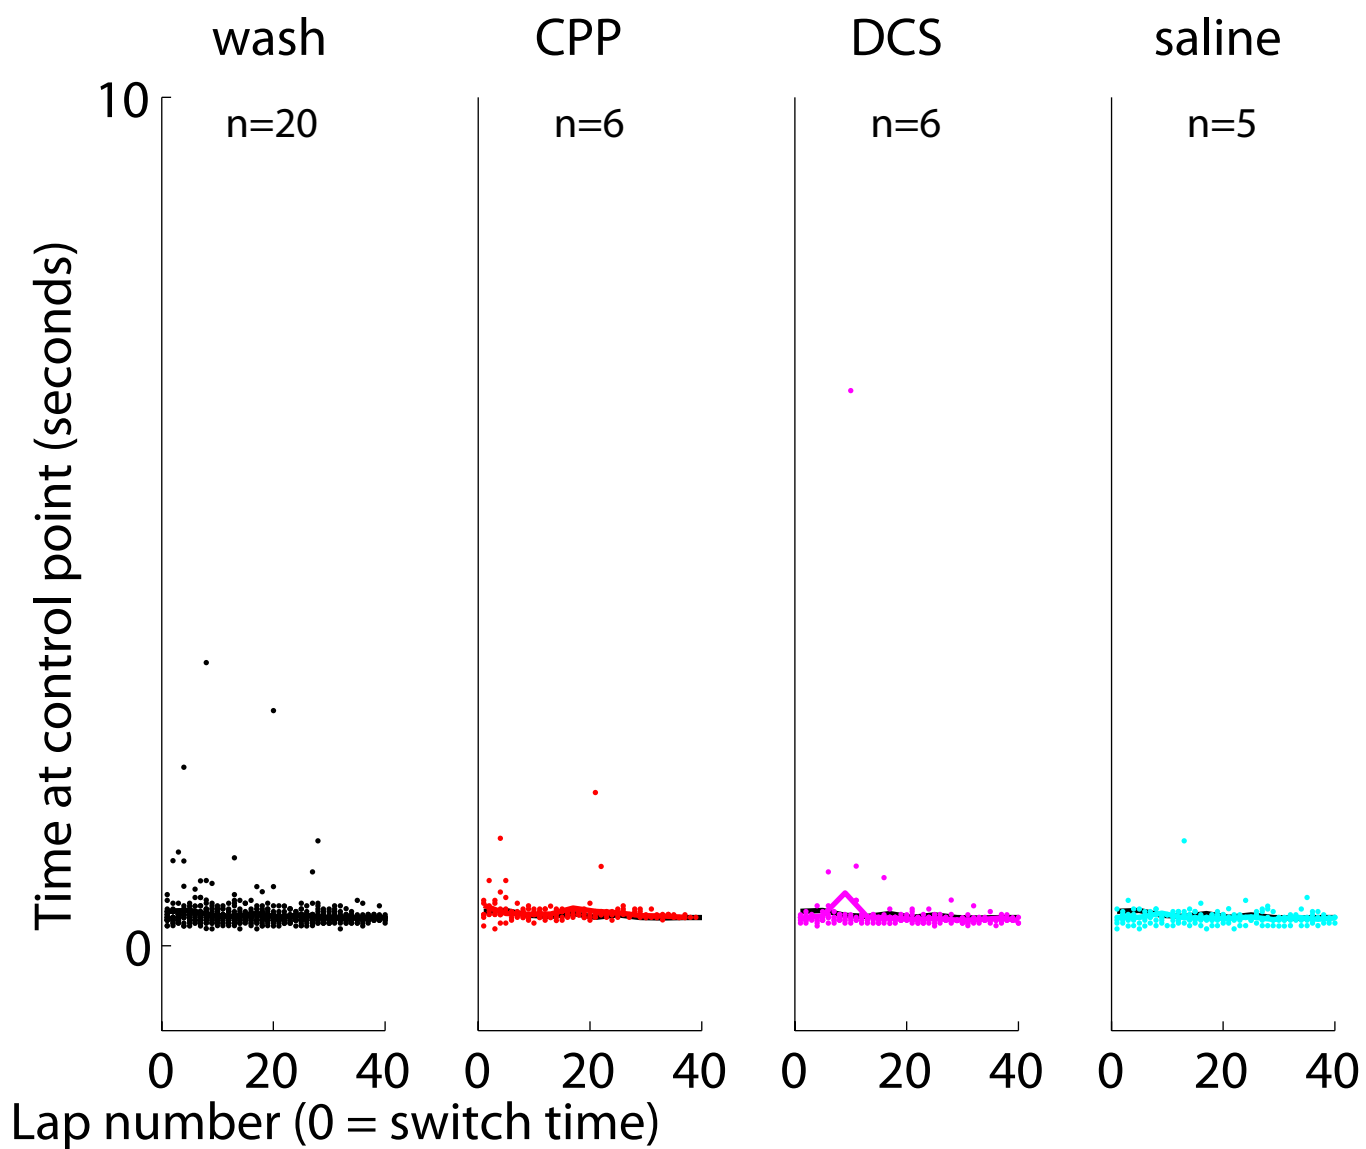

Figure S2b: Time at control point by condition aligned to switch in reward contingency. Only laps occurring after the contingency switch are included. The black line repeated on each panel is the average time for the wash condition.
